# Supplementary material for: Glia-derived ATP inversely regulates excitability of pyramidal and CCK-positive neurons
Source: PubMed Central journal article supplement (PMC5290168; doi:10.1038/ncomms13772), 2017-01-27
Supplement: ncomms13772-s1.pdf [file ncomms13772-s1.pdf]

1 **Supplementary Figure 1**

2

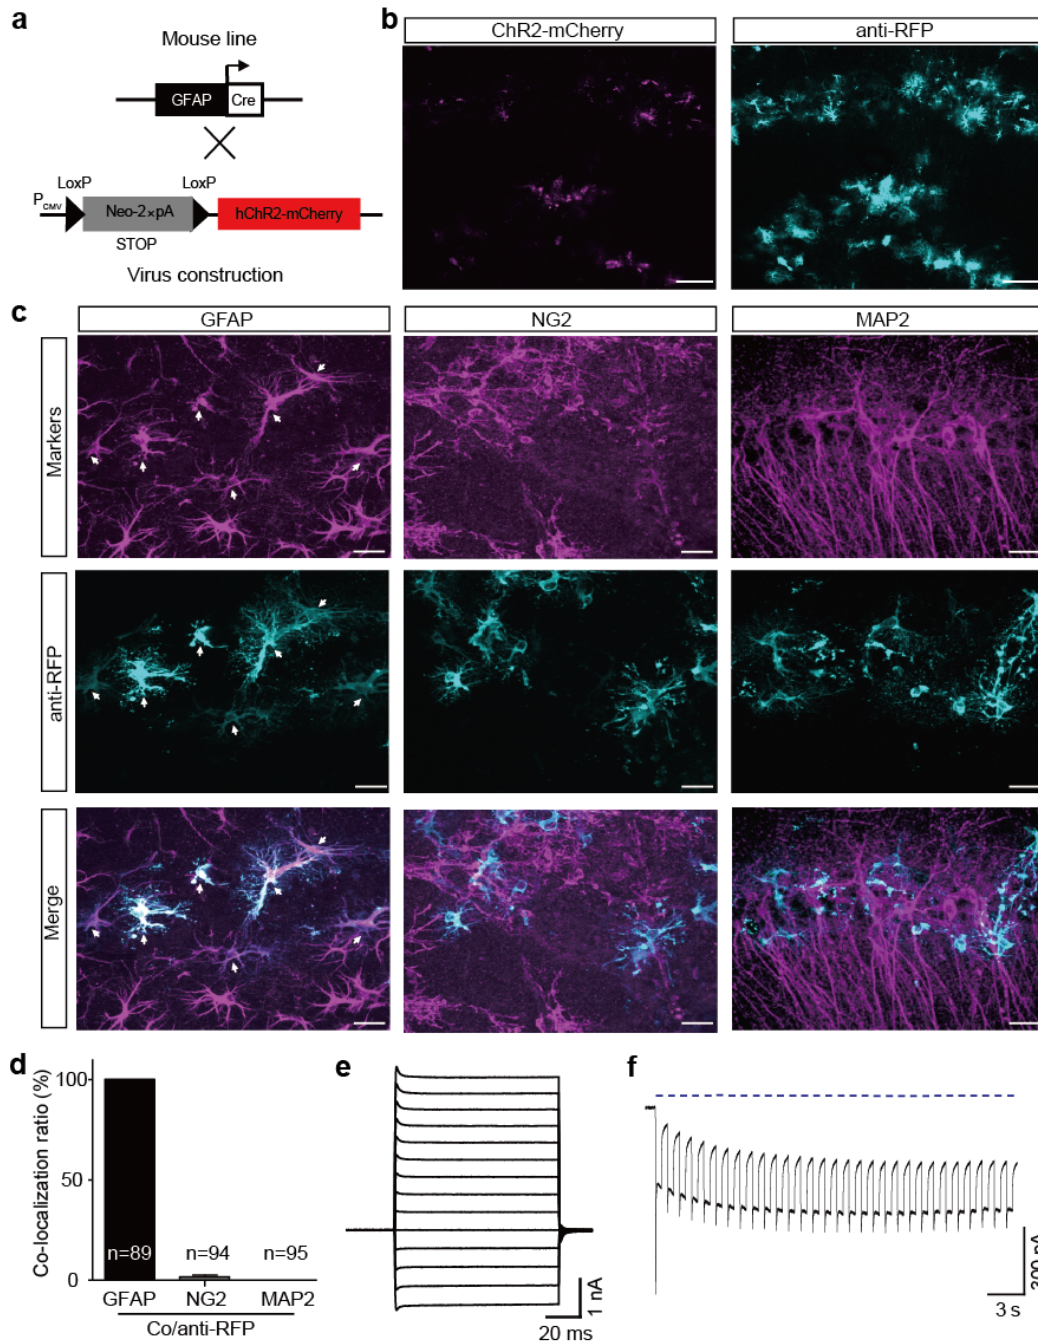

3

4

5 **Supplementary Fig. 1.** ChR2-mCherry is specifically expressed in astrocytes. (a)  
 6 Schematic diagram showing adeno-loxP-STOP-loxP (LS<sub>2</sub>L)-ChR2-mCherry with  
 7 Cre-dependent expression of ChR2. Neo-2xpA, a neomycin STOP cassette with two  
 8 polyadenylation sites. (b) Left: confocal image showing the expression level of ChR2-  
 9 mCherry. Right: anti-RFP antibody staining to highlight the ChR2-expressing cells.  
 10 Scale bars, 50  $\mu$ m. (c) Expression of ChR2-mCherry (cyan) in the hippocampal CA1

11 region of GFAP-Cre mice and its co-localization (white arrows) with the astrocyte-  
12 specific marker GFAP (magenta, left), but not with the NG2 glial cell marker NG2  
13 (magenta, middle) or the neuronal marker MAP2 (magenta, right). Scale bars, 50  $\mu$ m.  
14 (d) Statistical results of C. Note that numbers indicate cells being analyzed. (e)  
15 Current responses from an astrocyte evoked by step voltages (100 ms, 20 mV) from –  
16 160 to +100 mV. (f) Light pulses (blue bars, 500 ms, 1 Hz) reliably induced inward  
17 currents in a ChR2-expressing astrocyte in a hippocampal slice.

18  
19  
20  
21  
22  
23  
24  
25  
26  
27  
28  
29  
30  
31  
32  
33  
34  
35  
36  
37  
38  
39  
40  
41  
42  
43  
44  
45  
46  
47  
48  
49  
50  
51  
52  
53  
54

55 **Supplementary figure 2**

56

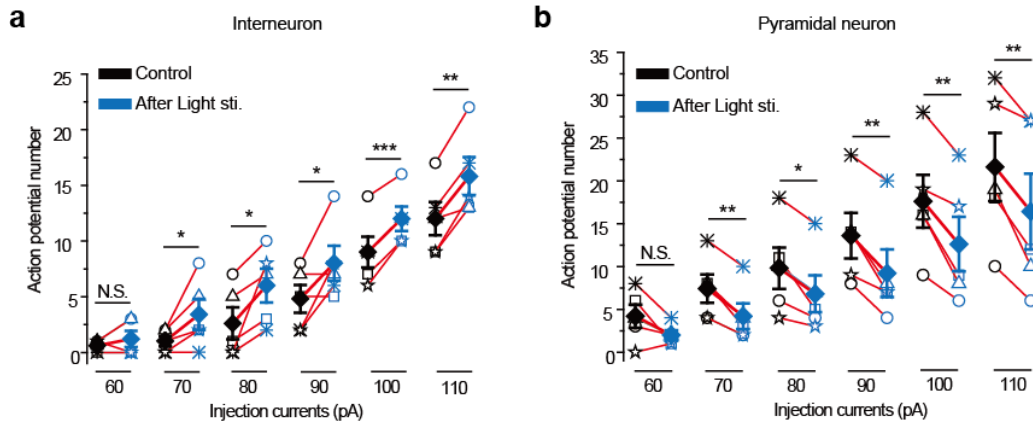

57

58

59 **Supplementary Fig. 2.** Summary of light-induced AP change in a step-current  
60 injection protocol. (a) Summary of change in interneuron AP numbers before (black)  
61 and after (blue) light stimulation at each current injection level. Open and filled  
62 symbols represent individual and averaged AP numbers, respectively. Paired Student's  
63 *t* test, 60 pA:  $P=0.187$ , 70 pA:  $P=0.04$ , 80 pA:  $P=0.0217$ , 90 pA:  $P=0.0389$ , 100 pA:  
64  $P=0.00034$ , 110 pA:  $P=0.0033$ . (b) Summary of change in pyramidal neuron AP  
65 numbers before (black) and after (blue) light stimulation at each current injection  
66 level. Open and filled symbols represent individual and averaged AP numbers,  
67 respectively. Paired Student's *t* test, 60 pA:  $P=0.054$ , 70 pA:  $P=0.0026$ , 80 pA:  
68  $P=0.0115$ , 90 pA:  $P=0.0045$ , 100 pA:  $P=0.0059$ , 110 pA:  $P=0.0054$ .

69

70

71

72

73

74

75

76

77

78

79

80

81

82

83

84

85

86

87

88 **Supplementary figure 3**

89

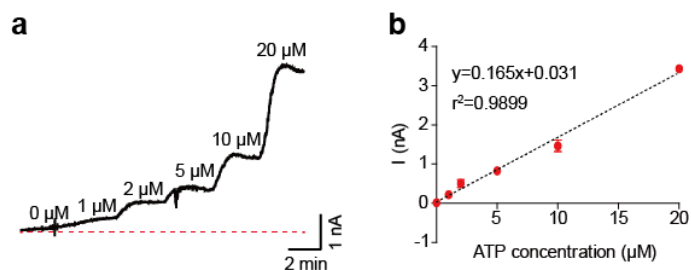

90

91

92 **Supplementary Fig. 3.** Standard curve of ATP-specific biosensor. (a) Representative  
93 trace showing current induced by various concentrations of ATP standard samples  
94 (from 1-20 μM). (b) Standard curve of an ATP-specific biosensor. Light stimuli  
95 induced increase of ATP concentration was calculated using the function obtained  
96 from linear fitting.

97

98

99

100

101

102

103

104

105

106

107

108

109

110

111

112

113

114

115

116

117

118

119

120

121

122

123

124

125

126 **Supplementary figure 4**

127

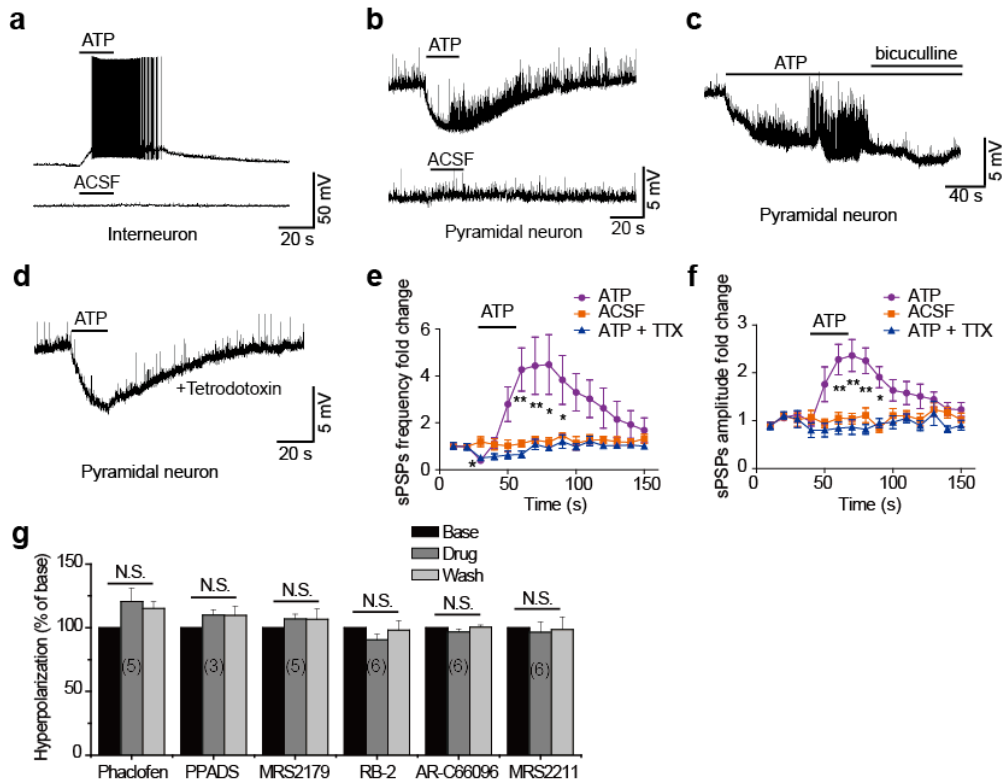

128

129

130 **Supplementary Fig. 4.** A high concentration of ATP induces robust depolarization in  
 131 interneurons and hyperpolarization in pyramidal neurons. (a) Upper: representative  
 132 trace of 100  $\mu$ M ATP-induced depolarization in an interneuron. Note that such  
 133 depolarization was sufficient to induce AP firing. Lower: HEPES-buffered aCSF  
 134 puffing had no evident effect on membrane potential in the same neuron. (b) Upper:  
 135 representative trace of 100  $\mu$ M ATP-induced hyperpolarization in a pyramidal neuron.  
 136 Note the transient inhibition followed by potentiation of spontaneous post-synaptic  
 137 potentials (sPSPs) during ATP puffing. Lower: HEPES-buffered aCSF puffing did not  
 138 induce an evident membrane potential change in the same neuron. (c) Example trace  
 139 showing the increased frequency and amplitude of PSPs in a pyramidal neuron during  
 140 ATP puffing was totally blocked by 10  $\mu$ M bicuculline. (d) Representative trace  
 141 showing the increased frequency and amplitude of PSPs in a pyramidal neuron during  
 142 ATP puffing was totally blocked by 0.5  $\mu$ M tetrodotoxin. (e, f) Statistical analysis of  
 143 sPSPs frequency (e, two way ANOVA,  $F_{(2, 315)}=70.22$ ,  $P<0.0001$ ) and amplitude (f,  
 144 two way ANOVA,  $F_{(2, 315)}=57.72$ ,  $P<0.0001$ ) changes in (b) and (d). (g) Summary data  
 145 showing the percentage inhibition of ATP-induced hyperpolarization by various  
 146 antagonists (Student's *t* test, phaclofen:  $P=0.144$ , PPADS:  $P=0.523$ , MRS2179:  
 147  $P=0.334$ , RB-2:  $P=0.0926$ , AR-C66096:  $P=0.0981$ , MRS2211:  $P=0.905$ ). Data are  
 148 normalized to the hyperpolarization amplitude induced by ATP in the absence of  
 149 antagonists. N.S., not significant.

150

151 **Supplementary figure 5**

152

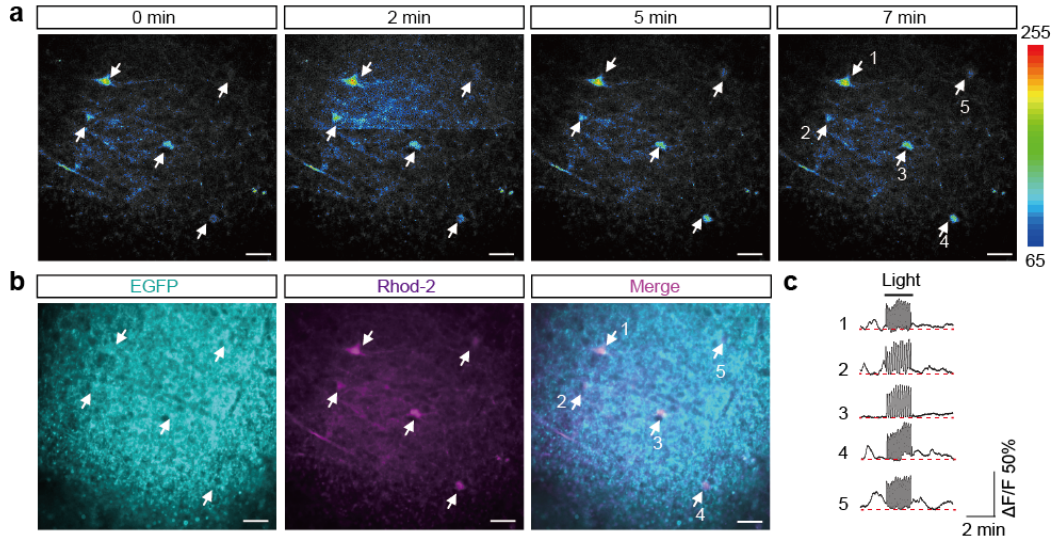

153

154

155 **Supplementary Fig. 5.** Light-stimuli have no effect on calcium signal in astrocytes  
156 expressing EGFP in brain slice. (a) Example time-lapse confocal imaging of Ca<sup>2+</sup>  
157 signals. Light stimuli was applied at time point 2 min and lasted for 2 min. (b)  
158 Confocal images showing the EGFP-expressing astrocytes (cyan) loaded with the  
159 Ca<sup>2+</sup> fluorescent dye Rhod-2 (magenta). Images are from the same field as in (a).  
160 Scale bars in (a) and (b) indicate 20 μm. (c) Example traces of light-induced Ca<sup>2+</sup>  
161 signals ( $\Delta F/F$ ) in astrocyte as numbered in (a) and (b). Dotted lines indicate base level  
162 of Ca<sup>2+</sup> signals.

163

164

165

166

167

168

169

170

171

172

173

174

175

176

177

178

179

180

181

182 **Supplementary figure 6**

183

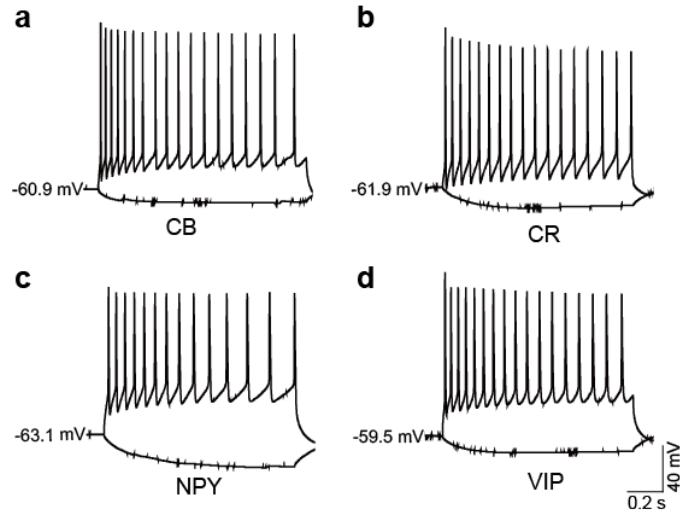

184

185 **Supplementary Fig. 6.** Sample traces showing the membrane potential change and  
186 AP discharge pattern of CB, CR, NPY, and VIP interneurons in response to 1 second  
187 20 pA hyperpolarizing and 100 pA depolarizing pulse stimuli.

188

189

190

191

192

193

194

195

196

197

198

199

200

201

202

203

204

205

206

207

208

209

210

211

212

213 **Supplementary figure 7**

214

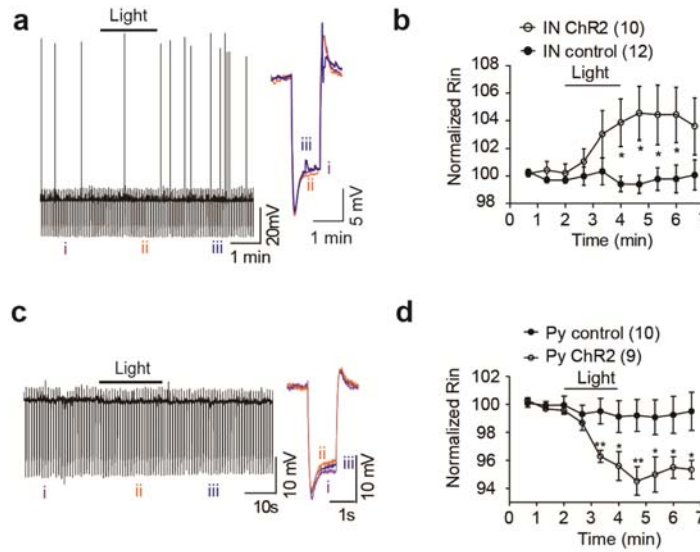

215

216 **Supplementary Fig. 7.** Light stimuli induced input resistance changes in interneuron  
 217 and pyramidal neuron. (a) Sample trace showing interneuron input resistance ( $R_{in}$ )  
 218 recorded before, during, and after light-stimuli monitored by -50 pA current injection  
 219 every 5 s. (i), (ii), and (iii) indicate representative  $R_{in}$  traces in each period as  
 220 indicated. (b) Time-course of the interneuron  $R_{in}$  change during light-stimuli in  
 221 ChR2-expression slices (open circles) or EGFP expression slices (filled circles) (two  
 222 way ANOVA,  $F_{(1, 200)}=28.34$ ,  $P<0.0001$ ). Data are normalized to the  $R_{in}$  averaged  
 223 from 2 min of recording before light stimuli in each case. (c) Sample trace showing  
 224 pyramidal neuron  $R_{in}$  recorded before, during, and after light stimuli monitored by -  
 225 50 pA current injection every 5 s. (i), (ii), and (iii) indicate representative  $R_{in}$  traces  
 226 in each period as indicated. (d) Time-course of interneuron  $R_{in}$  changes before, during  
 227 and after light stimuli in ChR2-expression slices (open circles) or EGFP-expression  
 228 slices (filled circles) (two way ANOVA,  $F_{(1, 170)}=39.45$ ,  $P<0.0001$ ). Data are  
 229 normalized to the  $R_{in}$  averaged from 20 s of recording before drug application in each  
 230 case.

231

232

233

234

235

236

237

238

239

240

241

242



243 **Supplementary figure 8**

244

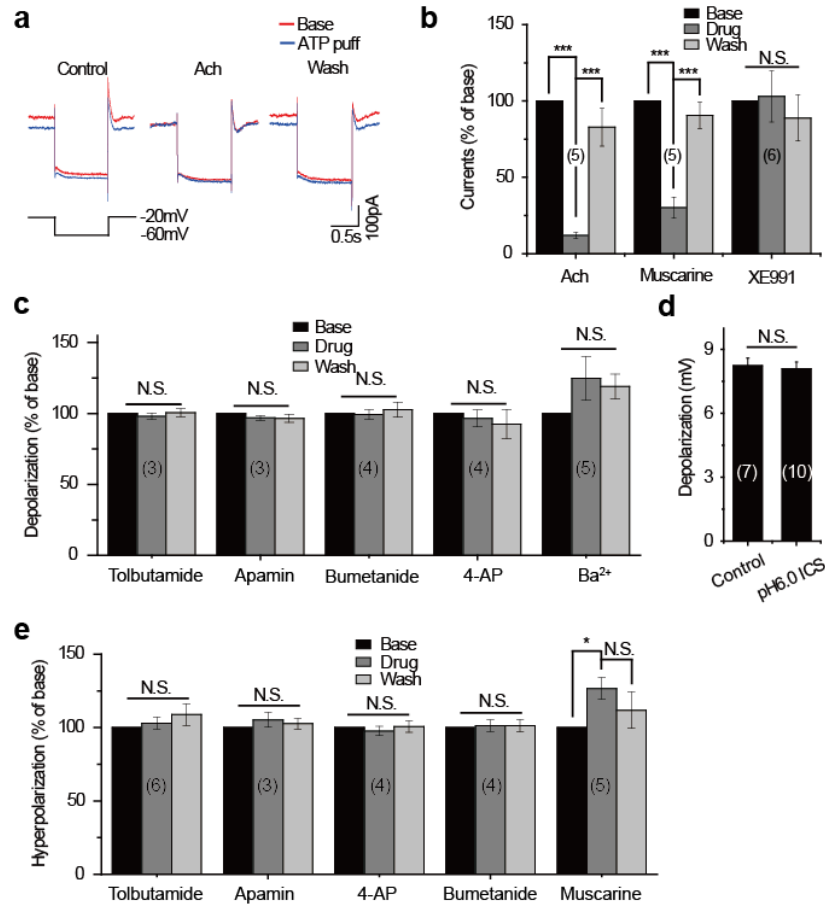

245

246 **Supplementary Fig. 8.** Involvement of K<sup>+</sup> channels in the ATP-induced modulation  
 247 of neuronal excitability. (a) Representative traces showing the inhibition of ATP on  
 248 standing outward K<sup>+</sup> current (I<sub>kso</sub>), an effect that was unmasked by 0.5 mM  
 249 acetylcholine (ACh). (b) Summary data showing the percentage of ATP-induced  
 250 inhibition of I<sub>kso</sub> in the presence of Ach (Student's *t* test, \*\*\*P<0.0001, \*\*\*P<0.0001),  
 251 muscarine (Student's *t* test, \*\*\*P<0.0001, \*\*\*P<0.0001), and XE991 (Student's *t* test,  
 252 P=0.628). Data are normalized to the current inhibition by ATP in the absence of  
 253 antagonists. (c) Summary data showing the percentage inhibition of ATP-induced  
 254 depolarization by various K<sup>+</sup> channel blockers (Student's *t* test, tolbutamide: P=0.628,  
 255 apamin: P=0.772, bumetanide: P=0.818, 4-AP: P=0.788, Ba<sup>2+</sup>: P=0.214). Data are  
 256 normalized to the depolarization amplitude induced by ATP in the absence of blockers.  
 257 (d) Summarized data showing the effect of intracellular acidification (pH 6.0,  
 258 Student's *t* test, P=0.628) on ATP-induced depolarization. (e) Summary data showing  
 259 the percentage inhibition of ATP-induced hyperpolarization by various K<sup>+</sup> channel  
 260 blockers (Student's *t* test, tolbutamide: P=0.956, apamin: P=0.611, 4-AP: P=0.326,  
 261 bumetanide: P=0.636, muscarine: \*P=0.024, P=0.064). Data are normalized to the  
 262 hyperpolarization amplitude induced by ATP in the absence of blockers. N.S., not  
 263 significant.

264 **Supplementary figure 9**

265

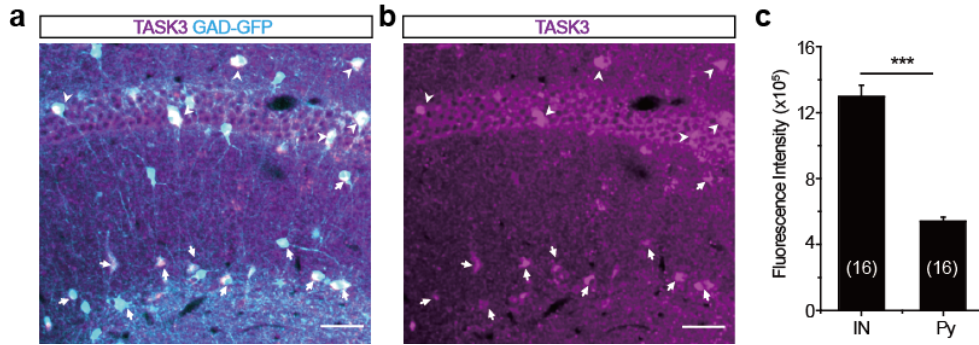

266

267

268 **Supplementary Fig. 9.** The expression levels of TASK3 differ in pyramidal neurons  
269 and interneurons. (a, b) Confocal images showing the expression level of TASK3 in  
270 pyramidal neurons and interneurons. Co-localization is indicated by arrows in the  
271 SR/SLM and by arrowheads in the SO/SP. Scale bars, 60  $\mu$ m. (c) Summary of TASK3  
272 expression level in pyramidal neurons and interneurons as reflected by fluorescence  
273 intensity (Student's *t* test, \*\*\* $P < 0.0001$ ).

274

275

276

277

278

279

280

281

**Supplementary table 1. Sequences of PCR primers.**

| Gene              | GenBank no.    | RT-PCR primers                                 | Outer primers                                                                 | Size | Inner primers                                                                 | Size |
|-------------------|----------------|------------------------------------------------|-------------------------------------------------------------------------------|------|-------------------------------------------------------------------------------|------|
| P2Y1              | NM_008772.4    | 1670*: ATTACTCGTGGCT-<br>CGGGACAGTCTCCTTCT     | Sence, 857: CGTGGCTATCTGGATGTTTCGT<br>Antisence, 1563: AAGTGGCATAAACCCCTGTCGT | 707  | Sence, 1054: ACGGTAGCATCTTGTTCTCTCA<br>Antisence, 1231: CCGAGTCCCAGTGCCAGAGTA | 178  |
| A1<br>(Adora1)    | NM_001008533.2 | 2155: GTGCGAAGGCTGA-<br>GGAGGAACAGTGGGACA      | Sence, 1358: CTGGCTCTGCTATTGCTG<br>Antisence, 2000: GGCATCGGAAGTGGTCGTT       | 643  | Sence, 1362: CTCTGCTTGCTATTGCTGTG<br>Antisence, 1637: CCCAGACGAAGAAGTTGAA     | 276  |
| TASK-3<br>(KCNK9) | NM_001033876.1 | 829: GCGACGCACGGAC-<br>AGACACTTCTTGGATT        | Sence, 246: TTCCTTCTACTTCGCCATCA<br>Antisence, 789: AATCTCCGCAACTTCTCCC       | 544  | Sence, 248: CCTTCTACTTCGCCATCACT<br>Antisence, 384: CAGGCTCTGGAACATAACCA      | 137  |
| GAD 65<br>(Gad2)  | NM_008078.2    | 1545: CGGTTAGGGGACA-<br>CCCATCATCTTGTGAGGA     | Sence, 1049: TCTTTTCTCTGGTGGTGCC<br>Antisence, 1439: CCCCAAGCAGCATCCACAT      | 391  | Sence, 1159: GCGTTCACATCAGAGCATAG<br>Antisence, 1376: AGAGGATCAAAGCCCCATA     | 218  |
| CAMK II           | NM_009792.3    | 1036: CTCGGGTACATAGGT-<br>GGCAATGGTAGGGTGATC   | Sence, 379: GCGGAGGAACAAGAAGAAC<br>Antisence, 1026: TAGGTGGCAATGGTAGGGTG      | 648  | Sence, 700: TCCTGAACCCCTCACATCCAC<br>Antisence, 850: ATCTGCCATTGCGCGTCC       | 151  |
| CCK               | NM_031161.3    | 666: CGTCCATAGCATAGCAA-<br>CATTAGGTCTGGGAGTCA  | Sence, 110: TGTCTGTGCGTGGTGATGG<br>Antisence, 657: CATAGCAACATTAGGTCTGGGAG    | 548  | Sence, 288: ACATCCAGCAGGTCCGCAA<br>Antisence, 521: AGACATTAGAGCGGAGGGGT       | 234  |
| CB<br>(Calb1)     | NM_009788.4    | 2448: TCACCTTCGGTCTAA-<br>AGTCACTGCTTCCAAATACG | Sence, 1518: GGCTTGGTAAGGGAAGGTAG<br>Antisence, 2072: ATGTGGGTCAGTGAAGGTTT    | 555  | Sence, 1597: GAGAGTATGACCATAGCCCAT<br>Antisence, 1794: AGCAGATACCCCTGGTGGAA   | 198  |
| CR<br>(Calb2)     | NM_007586.1    | 1094: TCAATCGTGACCC-<br>AACGCAGGCACAACCT       | Sence, 154: GATGCTGACGGAATGGGTA<br>Antisence, 738: GAGGGCGTCCAGTTCAITC        | 585  | Sence, 540: GACCATACTACGGATGTTGACTT<br>Antisence, 707: CCCTTCCATCCTTGICA      | 168  |
| NPY               | NM_023456.2    | 320: CGCTGGCCTTCATTAA-<br>GAGGTCTGAAATCAGTGTCT | Sence, 89: CGAATGGGGCTGTGTGGA<br>Antisence, 382: AAGTTTCATTTCCCATCACCACAT     | 294  | Sence, 112: CCTCGCTCTAICTCTGCTCGT<br>Antisence, 329: CGTTTTCTGTGCTTTCTCTCA    | 218  |
| VIP               | NM_011702.2    | 1287: GTGATGCGTCTCTG-<br>AAGTAGCCCTTGGGGATTG   | Sence, 52: CGGGAACAGACTGGTGGAG<br>Antisence, 442: TCTGCTGTAATCGTGGTGA         | 391  | Sence, 170: GCCAGAAGCAAGCCTCAGTT<br>Antisence, 290: GCATCCTGTCATCCAGCCTAC     | 121  |

282 Note: Instead of using poly dT, we used gene-specific antisense primers with  
 283 several modifies at 5' end to do the RT-PCR.

284 The name of the gene is listed in parentheses when it differs from the usual name of  
 285 the marker.

286 \*: Number indicates first base of the start codon.

287

288

289

290

291

292

293

294

295

296

297 **Supplementary Materials and Methods**

298

299 **Electrophysiology**

300 To assay neuronal excitability in current-clamp mode, depolarizing current (50-100  
301 pA) was injected to maintain continuous AP firing at 0.5-1.5 Hz. Bicuculline (10  $\mu$ M)  
302 and kynurenic acid (0.5 mM) were added to the perfusate to exclude the influence of  
303 synaptic transmission. Blue light or the indicated drugs were applied after at least 2  
304 min of steady firing was recorded. All the light stimulation experiments were  
305 performed at 32°C to facilitate the release of ATP from astrocytes.

306

307 The resting membrane potential was held to approximately -60 mV for interneurons  
308 and -70 mV for pyramidal neurons when assessing the effects of exogenous ATP in  
309 current clamp mode, to minimize the impact of membrane potential on ATP-induced  
310 potential change. Exogenous ATP or ATP $\gamma$ s was diluted in HEPES-buffered aCSF  
311 with pH adjusted to 7.35 and puffed with a Picospritzer III (Parker Hannifin Corp.)  
312 for 20 s each time. We found no evident difference between ATP and ATP $\gamma$ s  
313 application, so these data were pooled. In some cases, 0.5  $\mu$ M tetrodotoxin was added  
314 to the perfusate to block APs and spontaneous postsynaptic potentials (sPSPs) and  
315 reveal the underlying ATP-induced change in membrane potential. Standing outward  
316 K<sup>+</sup> current (I<sub>kso</sub>) was pre-activated by holding the membrane potential at -20 mV, and  
317 the deactivation current was recorded by stepping to -60 mV for 1 s every 10 s. In all  
318 the whole-cell electrophysiological experiments, accessory resistance was monitored  
319 before and after recording, and those with a >20% change were excluded from the  
320 analysis.

321

322 **Slice culture**

323 Brains from P13 C57/BL6 mice were cut in aCSF on a vibratome as above.  
324 Hippocampi were separated from slices and rinsed 3 times in complete Hanks'  
325 balanced salt solution (HBSS) containing (in mM): 2.5 HEPES, 30 glucose, 1 CaCl<sub>2</sub>,  
326 1 MgSO<sub>4</sub>, 4 NaHCO<sub>3</sub>, and 100 U penicillin-streptomycin (pH 7.4). After that,  
327 hippocampi were transferred to the surface of a Millicell-CM culture insert (Millipore)  
328 which was placed in a dish containing slice culture medium: 50% minimum essential  
329 medium, 25% heat-inactivated normal horse serum, 25% HBSS, and 0.65% glucose.  
330 In some cases, pertussis toxin (2  $\mu$ g/ml) was added. After treatment for >24 h,  
331 hippocampi were used for electrophysiological recording.

332
